# Supplementary material
Source: PubMed Central journal article supplement (PMC5469719)
Supplement: mol-23-16_257_Santuario-Facio_Suppl.pdf [file mol-23-16_257_Santuario-Facio_Suppl.pdf]

Supplemental Data

A New Gene Expression Signature for Triple-Negative Breast Cancer Using Frozen Fresh Tissue before Neoadjuvant Chemotherapy

Sandra K Santuario-Facio,<sup>1,7\*</sup> Servando Cardona-Huerta,<sup>2\*</sup> Yadira X Perez-Paramo,<sup>3</sup> Victor Trevino,<sup>4</sup> Francisco Hernandez-Cabrera,<sup>5</sup> Augusto Rojas-Martinez,<sup>1,7</sup> Grecia Uscanga-Perales,<sup>6</sup> Jorge L Martinez-Rodriguez,<sup>2,8</sup> Lizeth Martinez-Jacobo,<sup>6</sup> Gerardo Padilla-Rivas,<sup>6</sup> Gerardo Muñoz-Maldonado,<sup>9</sup> Juan Francisco Gonzalez-Guerrero,<sup>10</sup> Javier Valero-Gomez,<sup>2</sup> Ana L Vazquez-Guerrero,<sup>2</sup> Herminia G Martinez-Rodriguez,<sup>6</sup> Alvaro Barboza-Quintana,<sup>2</sup> Oralia Barboza-Quintana,<sup>11</sup> Raquel Garza-Guajardo,<sup>11</sup> and Rocio Ortiz-Lopez<sup>1,7</sup>

Online address: <http://www.molmed.org>

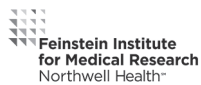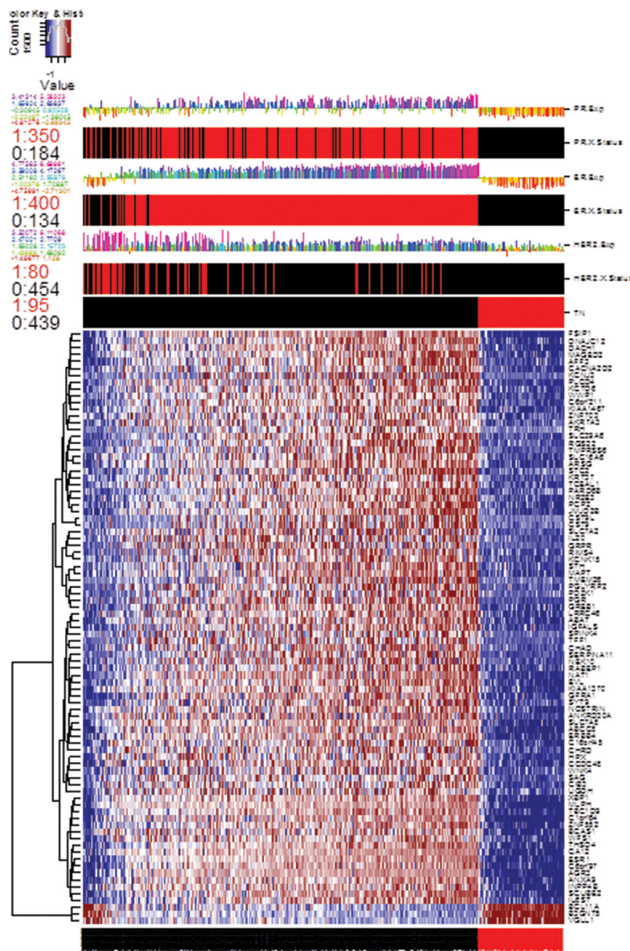

Supplementary Figure S1. TCGA Validation, first approach. Gene signature of 87 differentially expressed genes with high significance ( $q < 1e-40$ ), only nine genes overlap with our signature.

GENE SIGNATURE OF TRIPLE NEGATIVE BREAST CANCER

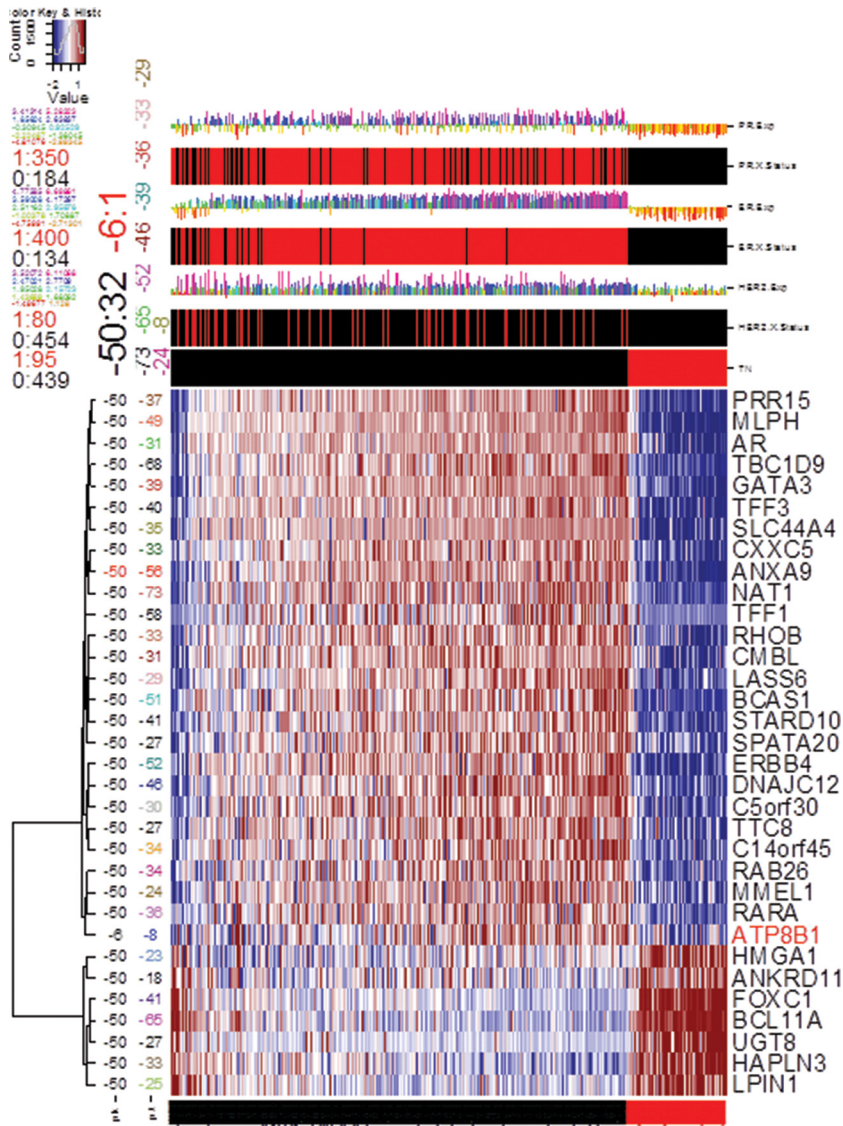

**Supplementary Figure S2.** TCGA Validation, second approach. Differential expression of TNBC versus nTNBC using only 33 of 40 genes of our signature.

Supplemental Table S1. TNBC signature (40 genes and 49 probes).

| Expression TNBC | Gene Symbol   | ID Probe     | Gene Title                                                        | t test p value | Kolmogorov test p value | FDR test p value | FDR k p value |
|-----------------|---------------|--------------|-------------------------------------------------------------------|----------------|-------------------------|------------------|---------------|
| Over            | ANKRD11       | 238538_at    | Ankyrin repeat domain 11                                          | 2.01e-07       | 9.19e-07                | 0.0001076        | 0.00048764    |
| Over            | BCL11A        | 1559078_at   | B-cell cll/lymphoma 11a (zinc finger protein)                     | 4.12e-08       | 3.49e-08                | 4.00e-05         | 0.00014361    |
| Over            | BCL11A        | 210347_s_at  | B-cell cll/lymphoma 11a (zinc finger protein)                     | 2.66e-10       | 1.15e-07                | 4.52e-06         | 0.00020489    |
| Over            | BCL11A        | 222891_s_at  | B-cell cll/lymphoma 11a (zinc finger protein)                     | 7.57e-09       | 4.04e-07                | 1.71e-05         | 0.00029192    |
| Over            | FAM171A1      | 212771_at    | Family with sequence similarity 171, member a1                    | 7.42e-08       | 6.21e-07                | 6.14e-05         | 0.00036378    |
| Over            | FOXC1         | 1553613_s_at | Forkhead box c1                                                   | 2.71e-09       | 2.52e-07                | 1.32e-05         | 0.00023999    |
| Over            | HAPLN3        | 227262_at    | Hyaluronan and proteoglycan link protein 3                        | 2.29e-07       | 4.23e-08                | 0.0001132        | 0.00014361    |
| Over            | HMGAT1        | 210457_x_at  | High mobility group at-hook 1                                     | 8.39e-07       | 6.79e-08                | 0.000259         | 0.00016469    |
| Over            | LPIN1         | 212276_at    | Lipin 1                                                           | 9.37e-08       | 1.15e-07                | 6.69e-05         | 0.00020489    |
| Over            | PRKX /// PRKY | 204060_s_at  | Protein kinase, x-linked /// protein kinase, y-linked             | 4.79e-09       | 1.04e-08                | 1.58e-05         | 8.84E-05      |
| Over            | UGT8          | 208358_s_at  | Udp glycosyltransferase 8                                         | 4.54e-07       | 1.87e-08                | 0.0001837        | 0.00010584    |
| Over            | UGT8          | 228956_at    | Udp glycosyltransferase 8                                         | 3.17e-07       | 1.72e-07                | 0.0001418        | 0.00023999    |
| Under           | ANXA9         | 211712_s_at  | Annexin a9                                                        | 2.45e-08       | 3.79e-09                | 2.98e-05         | 6.43E-05      |
| Under           | ANXA9         | 210085_s_at  | Annexin a9                                                        | 1.35e-06       | 2.52e-07                | 0.0003491        | 0.00023999    |
| Under           | AR            | 211110_s_at  | Androgen receptor                                                 | 1.72e-08       | 2.93e-07                | 2.65e-05         | 0.00024238    |
| Under           | ATP8B1        | 226302_at    | ATPase, aminophospholipid transporter, class I, type 8b, member 1 | 2.49e-07       | 9.19e-07                | 0.000121         | 0.00048764    |
| Under           | BCAS1         | 204378_at    | Breast carcinoma amplified sequence 1                             | 2.15e-06       | 1.15e-07                | 0.0004628        | 0.00020489    |
| Under           | C5orf30       | 221823_at    | Chromosome 5 open reading frame 30                                | 1.46e-06       | 6.21e-07                | 0.0003575        | 0.00036378    |
| Under           | CCDC96        | 238682_at    | Coiled-coil domain containing 96                                  | 5.08e-06       | 2.61e-07                | 0.0007376        | 0.00023999    |
| Under           | CMBL          | 227522_at    | Carboxymethylenebutenolidase homolog (pseudomonas)                | 1.40e-08       | 6.21e-07                | 2.32e-05         | 0.00036378    |
| Under           | CXC5          | 224516_s_at  | Cxcr5 finger protein 5                                            | 6.75e-07       | 2.22e-07                | 0.0002293        | 0.00023999    |
| Under           | DNAJC12       | 223721_s_at  | Dnaj (hsp40) homolog, subfamily c, member 12                      | 2.11e-07       | 4.23e-08                | 0.0001102        | 0.00014361    |
| Under           | DNAJC12       | 218976_at    | Dnaj (hsp40) homolog, subfamily c, member 12                      | 2.19e-08       | 6.79e-08                | 2.87e-05         | 0.00016469    |
| Under           | ERBB4         | 214053_at    | V-erb-a erythroblastic leukemia viral oncogene homolog 4 (avian)  | 5.30e-07       | 6.21e-07                | 0.0001998        | 0.00036378    |
| Under           | FAM174B       | 51158_at     | Family with sequence similarity 174, member b                     | 7.50e-09       | 2.22e-07                | 1.71e-05         | 0.00023999    |
| Under           | FAM174B       | 221880_s_at  | Family with sequence similarity 174, member b                     | 7.34e-08       | 2.93e-07                | 6.14e-05         | 0.00024238    |
| Under           | FLJ38379      | 1556474_a_at | Hypothetical flj38379                                             | 8.76e-09       | 2.73e-08                | 1.75e-05         | 0.00013249    |
| Under           | GATA3         | 209603_at    | Gata binding protein 3                                            | 5.34e-09       | 9.19e-07                | 1.58e-05         | 0.00048764    |
| Under           | GATA3         | 209602_s_at  | Gata binding protein 3                                            | 8.54e-10       | 9.19e-07                | 7.25e-06         | 0.00048764    |
| Under           | LASS6         | 212446_s_at  | Lag1 homolog, ceramide synthase 6                                 | 5.95e-08       | 1.72e-07                | 5.32e-05         | 0.00023999    |
| Under           | LASS6         | 242019_at    | Lag1 homolog, ceramide synthase 6                                 | 1.88e-05       | 6.21e-07                | 0.001669         | 0.00036378    |
| Under           | LOC100505614  | 237339_at    | Hypothetical loc100505614                                         | 3.79e-08       | 6.21e-07                | 3.84e-05         | 0.00036378    |
| Under           | LOC692247     | 1569453_a_at | Hypothetical locus loc692247                                      | 9.45e-08       | 6.06e-10                | 6.69e-05         | 2.06E-05      |
| Under           | MILPH         | 218211_s_at  | Melanophilin                                                      | 5.19e-10       | 1.15e-07                | 5.88e-06         | 0.00020489    |
| Under           | MIMEL1        | 1552930_at   | Membrane metallo-endoropeptidase-like 1                           | 1.21e-06       | 2.19e-07                | 0.0003269        | 0.00023999    |
| Under           | NAT1          | 214440_at    | N-acetyltransferase 1 (arylamine n-acetyltransferase)             | 3.04e-07       | 1.04e-08                | 0.0001397        | 8.84E-05      |
| Under           | TTC6          | 1556666_a_at | Non-protein coding rna 291                                        | 1.57e-06       | 6.79e-08                | 0.0003728        | 0.00016469    |
| Under           | PRR15         | 226961_at    | Proline rich 15                                                   | 2.15e-09       | 4.04e-07                | 1.24e-05         | 0.00029192    |
| Under           | RAB26         | 50965_at     | Rab26, member ras oncogene family                                 | 1.19e-07       | 2.22e-07                | 7.80e-05         | 0.00023999    |
| Under           | RARA          | 203749_s_at  | Retinoic acid receptor, alpha                                     | 7.68e-08       | 4.04e-07                | 6.21e-05         | 0.00029192    |
| Under           | RHOB          | 212099_at    | Ras homolog gene family, member b                                 | 3.99e-07       | 2.93e-07                | 0.0001693        | 0.00024238    |
| Under           | SLC44A4       | 205597_at    | Solute carrier family 44, member 4                                | 1.65e-07       | 1.87e-08                | 9.20e-05         | 0.00010584    |
| Under           | SPATA20       | 218164_at    | Spermatogenesis associated 20                                     | 1.82e-08       | 2.49e-07                | 2.68e-05         | 0.00023999    |
| Under           | STARD10       | 223103_at    | Star-related lipid transfer (start) domain containing 10          | 2.91e-08       | 1.72e-07                | 3.40e-05         | 0.00023999    |
| Under           | TBC1D9        | 212960_at    | Tbc1 domain family, member 9 (with gram domain)                   | 1.44e-07       | 2.22e-07                | 8.44e-05         | 0.00023999    |
| Under           | TBC1D9        | 212956_at    | Tbc1 domain family, member 9 (with gram domain)                   | 4.32e-09       | 6.21e-07                | 1.58e-05         | 0.00036378    |
| Under           | TFF1          | 205009_at    | Trefoil factor 1                                                  | 4.91e-07       | 2.22e-07                | 0.0001877        | 0.00023999    |
| Under           | TFF3          | 204623_at    | Trefoil factor 3 (intestinal)                                     | 6.32e-09       | 2.93e-07                | 1.65e-05         | 0.00024238    |
| Under           | TTC8          | 226120_at    | Tetraficopeptide repeat domain 8                                  | 1.29e-06       | 6.21e-07                | 0.0003421        | 0.00036378    |
